# Supplementary material for: No silver bullet for digital soil mapping: country-specific soil organic carbon estimates across Latin America
Source: Copernicus journal article supplement (doi:10.5194/soil-4-173-2018), 2018-08-01
Supplement: Supplementary file 1 [file soil-4-173-2018-supplement.pdf]

Supplement of SOIL, 4, 173–193, 2018  
<https://doi.org/10.5194/soil-4-173-2018-supplement>  
© Author(s) 2018. This work is distributed under  
the Creative Commons Attribution 4.0 License.

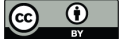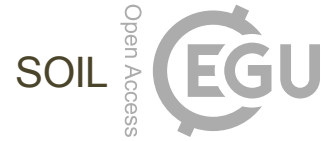

*Supplement of*

## **No silver bullet for digital soil mapping: country-specific soil organic carbon estimates across Latin America**

**Mario Guevara et al.**

*Correspondence to:* Rodrigo Vargas ([rvargas@udel.edu](mailto:rvargas@udel.edu))

The copyright of individual parts of the supplement might differ from the CC BY 4.0 License.

Supplementary Figure S1

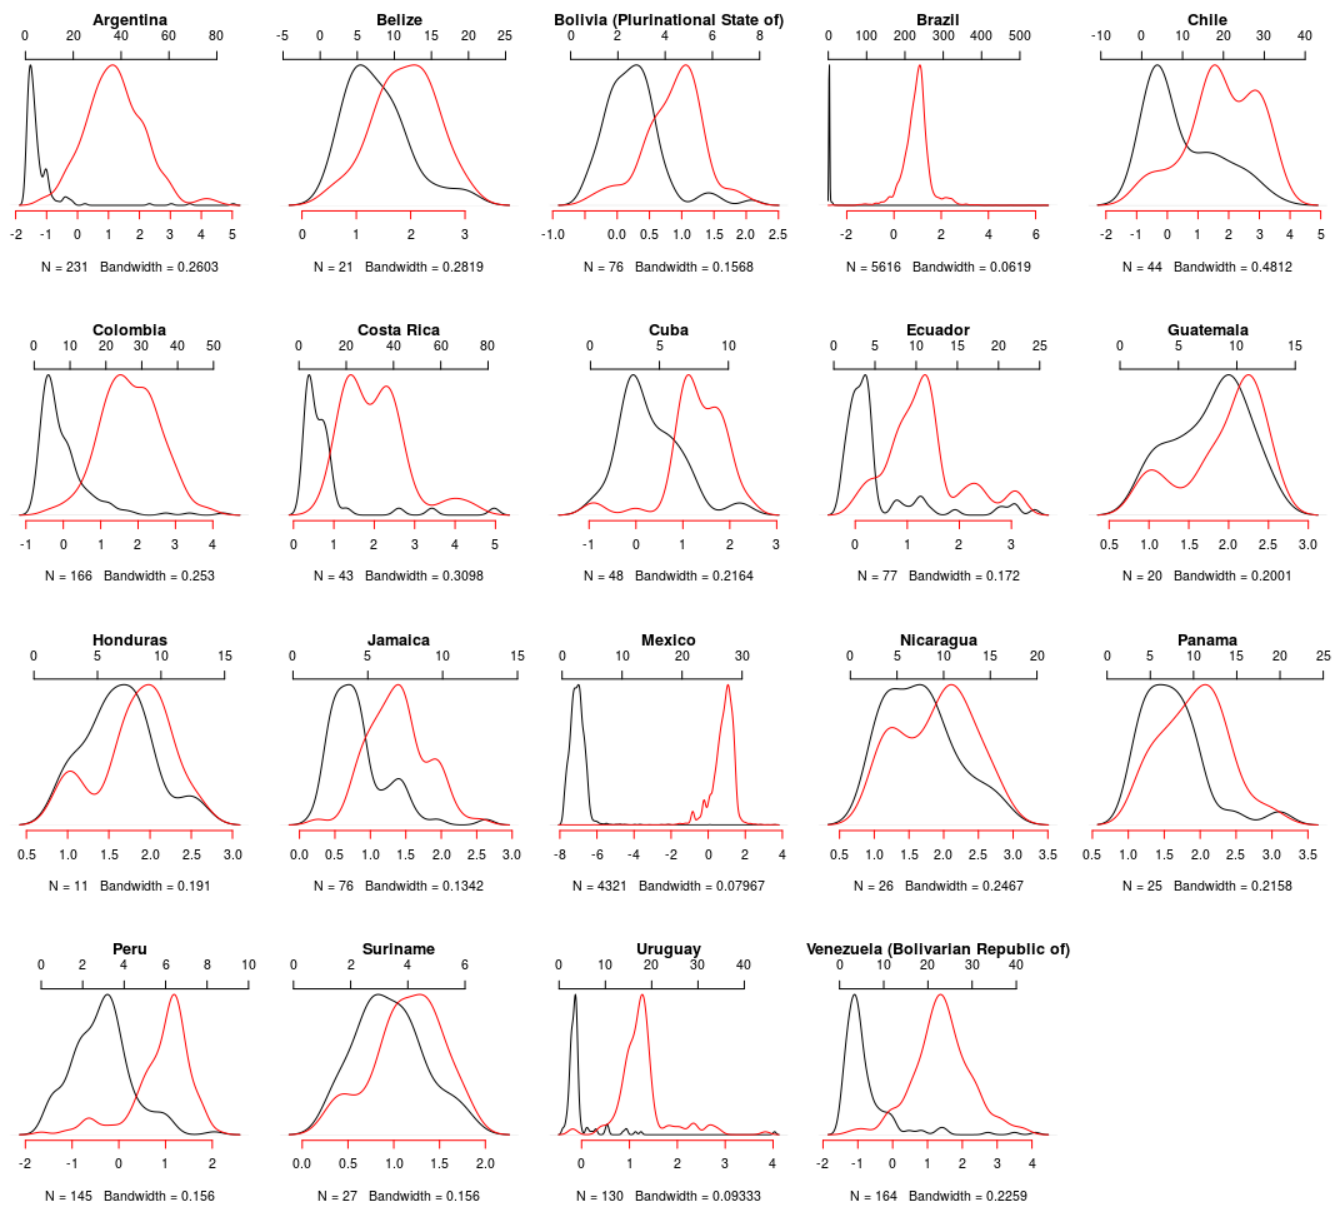

**Figure S1.** Probability distribution functions for the estimated SOC values (in kg.m<sup>2</sup>) before (black lines) and after (red lines) the log transformation across the 19 analyzed countries.
